# Supplementary material for: Real world data in mechanical thrombectomy: who are we losing to follow-up?
Source: PubMed Central journal article supplement — J Neurointerv Surg. 2023 Jul 17;16(5):471–7. doi: 10.1136/jnis-2023-020435 (PMC11041564; doi:10.1136/jnis-2023-020435), 2023-07-17
Supplement: jnis-2023-020435supp001.pdf [file jnis-2023-020435supp001.pdf]

**Supplemental Figure 1:****Title: Study cohort and comparison grouping**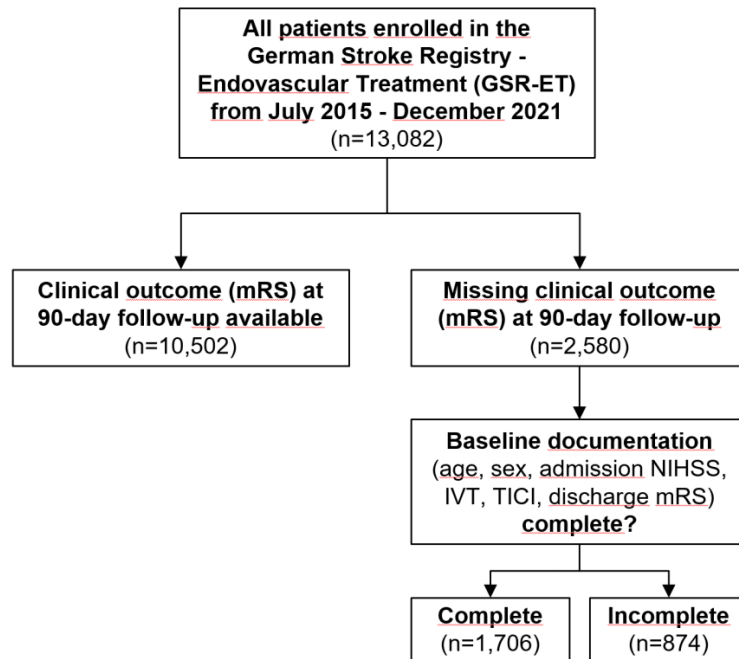

**Legend:** mRS: modified Rankin Scale score; IVT: intravenous thrombolysis; TICI: Thrombolysis in cerebral infarction scale score following mechanical thrombectomy; NIHSS: National Institute of Health Stroke Scale score
